# Supplementary material
Source: PubMed Central journal article supplement (PMC4789943)
Supplement: brc-0010-0413-s01.pdf [file brc-0010-0413-s01.pdf]

**Supplemental Table 1 A: Basic study characteristics**

| Study                      | Enrolled time | Population  |              |       | Age(years)                 | Follow-up (years) | Confounders*                                                     |
|----------------------------|---------------|-------------|--------------|-------|----------------------------|-------------------|------------------------------------------------------------------|
|                            |               | TNBC        | Non-TNBC     | Total |                            |                   |                                                                  |
| Haffty et al. USA,2006     | 1980-2003     | 117(24.27%) | 365(75.73%)  | 482   | <50(49.38%)<br>≥50(50.62%) | median:7.9        | age,family history,BRCA tumor size,chemotherapy hormones therapy |
| Solin et al. USA,2009      | 1990-2003     | 90(17.34%)  | 429(82.66%)  | 519   | <50(31.41%)<br>≥50(68.59%) | median:3.9        | tumor size,chemotherapy age,hormone therapy                      |
| Zaky et al. USA,2011       | 2003-2004     | 33(17.10%)  | 160(82.90%)  | 193   | <50(24.87%)<br>≥50(75.13%) | median:3.4        | chemotherapy,tumor grade, hormone therapy                        |
| Barbieri et al. Italy,2011 | 2002-2008     | 36(9.30%)   | 351(90.7%)   | 387   | <50(32.30%)<br>≥50(67.70%) | median:4.7        | tumor size,chemotherapy, hormone therapy,grade                   |
| Gangi et al. USA,2014      | 2000-2012     | 234(12.60%) | 1617(87.40%) | 1851  | <50(25.30%)<br>≥50(74.70%) | median:5.0        | age,tumor size,chemotherapy histology,pathologic stage, grade,   |

TNBC=triple negative breast cancer; \* represents confounders which were statistically different between TNBC and non-TNBC.

**Supplemental Table 1 B: Study treatment**

| Study           | Radiotherapy | Chemotherapy |             | Hormone therapy |             | Both                   | Trastuzumab          |
|-----------------|--------------|--------------|-------------|-----------------|-------------|------------------------|----------------------|
|                 |              | TNBC         | Non-TNBC    | TNBC            | Non-TNBC    |                        |                      |
| Haffty et al.   | median:64Gy  | 77(65.81%)   | 151(41.37%) | 9(7.69%)        | 200(54.79%) | NC                     | TNBC:0<br>Non-TNBC:0 |
| Solin et al.    | median:63Gy  | 56(62.22%)   | 49(11.42%)  | 6(6.67%)        | 139(32.40%) | TNBC:4<br>Non-TNBC:140 | TNBC:0<br>Non-TNBC:1 |
| Zaky et al.     | median:60Gy  | 23(69.70%)   | 64(40.00%)  | 1(3.03%)        | 127(79.38%) | NC                     | TNBC:0<br>Non-TNBC:0 |
| Barbieri et al. | median:60Gy  | 27(75.00%)   | 89 (25.36%) | 2(5.56%)        | 112(31.91%) | TNBC:0<br>Non-TNBC:124 | TNBC:0<br>Non-TNBC:0 |
| Gangi et al.    | NC           | 183(85.50%)  | 620(38.34%) | NC              | NC          | NC                     | NC                   |

Median dose was delivered to whole breast plus cavity; Both:received both chemotherapy and hormone therapy;  
TNBC= triple negative breast cancer; NC=not clear

**Supplemental Table 1 C: Surgery and radiotherapy in the studies**

| Study           | Surgery                                                                                                                                                                                  | Radiotherapy                                                                                                                                                                                                                                                                 |
|-----------------|------------------------------------------------------------------------------------------------------------------------------------------------------------------------------------------|------------------------------------------------------------------------------------------------------------------------------------------------------------------------------------------------------------------------------------------------------------------------------|
| Haffty et al.   | BCS.<br>Details of tumor resection and lymph node biopsy were not reported.                                                                                                              | Median dose to the whole breast: Nc<br>Median cavity boost:64Gy.<br>Supraclavicular nodal irradiation: NC.<br>Axillary nodal irradiation: NC.<br>Internal mammary nodal irradiation: NC.                                                                                     |
| Solin et al.    | Complete gross excision of the primary tumor.<br>Axillary lymph node staging was performed for all patients using a lower axillary lymph node dissection and sentinel lymph node biopsy. | Median dose to the whole breast:46Gy.<br>Median cavity boost:63Gy.<br>Supraclavicular nodal irradiation: 27 patients.<br>Axillary nodal irradiation: 9 patients.<br>Internal mammary nodal irradiation: 6 patients.                                                          |
| Zaky et al.     | Lumpectomy.<br>Detail of lymph node biopsy were not reported.                                                                                                                            | Median dose to the whole breast:50Gy.<br>Median cavity boost :60Gy.<br>Supraclavicular nodal irradiation: 34 patients.<br>Axillary nodal irradiation: 5 patients.<br>Internal mammary nodal irradiation: 2 patients.                                                         |
| Barbieri et al. | Lumpectomy with or without axillary nodal dissection, based on result of sentinel node.                                                                                                  | Median dose to the whole breast:50Gy.<br>Median cavity boost:60Gy.<br>Supraclavicular nodal irradiation: NC.<br>Axillary nodal irradiation: NC.<br>Internal mammary nodal irradiation: NC.                                                                                   |
| Gangi et al.    | BCS.<br>Details of tumor resection and lymph node biopsy were not reported.                                                                                                              | Median dose to the whole breast:NC.<br>Median cavity boost:NC<br>Supraclavicular nodal irradiation: NC.<br>Axillary nodal irradiation: NC.<br>Internal mammary nodal irradiation: NC.<br>Whole-breast radiotherapy: 94.1%.<br>Accelerated partial-breast radiotherapy: 3.8%. |

BCS=breast conservation surgery; NC=not clear.

**Supplemental Table 2 A: Study quality**

| Study           | Cohort design | Population Source        | ER/PR assessment | Her-2 assessment |
|-----------------|---------------|--------------------------|------------------|------------------|
| Haffty et al.   | retrospective | continuous clinic record | IHC              | IHC              |
| Solin et al.    | retrospective | continuous clinic record | IHC              | IHC              |
| Zaky et al.     | retrospective | continuous clinic record | IHC              | IHC/FISH         |
| Barbieri et al. | retrospective | continuous clinic record | IHC              | IHC/FISH         |
| Gangi et al.    | retrospective | continuous clinic record | IHC              | IHC/FISH         |

IHC=immunohistochemistry; FISH=fluorescent in situ hybridization; ER=estrogen receptor; PR=progesterone receptor; Her-2=human epidermal growth factor receptor 2.

**Supplemental Table 2 B: Study quality**

| Study           | Relapses assessment                        | Metastasis assessment           | Death assessment | Statistical adjusted? | Follow-up      |
|-----------------|--------------------------------------------|---------------------------------|------------------|-----------------------|----------------|
| Haffty et al.   | clinic and histology results               | clinic and/or radiology results | medical record   | Yes                   | Medical record |
| Solin et al.    | clinic, radiology and/or histology results | clinic and/or radiology results | medical record   | Yes                   | Medical record |
| Zaky et al.     | clinic, radiology and/or histology results | clinic and/or radiology results | medical record   | Yes                   | Medical record |
| Barbieri et al. | clinic and histology results               | clinic and/or radiology results | medical record   | Yes                   | Medical record |
| Gangi et al.    | NC                                         | NC                              | NC               | Yes                   | Medical record |

NC=not clear.

**Supplemental Table 2 C: Quality assessment**

| Potential bias                      | Items to be considered for assessment of potential opportunity for bias                                                                                           | Haffty et al. | Solin et al. | Zaky et al. | Barbieri et al. | Gangi et al. |
|-------------------------------------|-------------------------------------------------------------------------------------------------------------------------------------------------------------------|---------------|--------------|-------------|-----------------|--------------|
| Study participation                 | 1.The source population or population of interest is adequately described for key characteristics.                                                                | Yes           | Yes          | Yes         | Yes             | Yes          |
|                                     | 2.The sampling frame and recruitment are adequately described, possibly including methods to identify the sample, period of recruitment and place of recruitment. | Yes           | Yes          | Yes         | Yes             | Yes          |
|                                     | 3.Inclusion and exclusion criteria are adequately described.                                                                                                      | Yes           | Yes          | Yes         | Yes             | Yes          |
|                                     | 4.There is adequate participation in the study by eligible individuals.                                                                                           | Yes           | Yes          | Yes         | Yes             | Yes          |
|                                     | 5.The baseline study sample is adequately described for key characteristics.                                                                                      | Yes           | Yes          | Yes         | Yes             | Yes          |
| Study attrition                     | 6.Response rate is adequate.                                                                                                                                      | Yes           | Yes          | Unsure      | Unsure          | Yes          |
|                                     | 7.Attempts to collect information on participants who dropped out of the study are described.                                                                     | Partly        | No           | Partly      | Partly          | No           |
|                                     | 8.Reasons for loss to follow-up are provided.                                                                                                                     | No            | No           | No          | No              | No           |
|                                     | 9.Participants lost to follow-up are adequately described for key characteristics.                                                                                | No            | No           | No          | No              | No           |
|                                     | 10.There are no important differences between key characteristics and outcomes in participants who completed the study and those who did not.                     | Unsure        | Unsure       | Unsure      | Unsure          | Unsure       |
| Prognostic factor attrition         | 11.A clear definition or description of the prognostic factor measured is provided.                                                                               | Yes           | Yes          | Yes         | Yes             | Yes          |
|                                     | 12.Continuous variables are reported or appropriate cut-points are used.                                                                                          | Yes           | No           | Yes         | Yes             | Yes          |
|                                     | 13.The prognostic factor measure and method are adequately valid and reliable to limit misclassification bias.                                                    | Partly        | Partly       | Yes         | Yes             | Partly       |
|                                     | 14.Adequate proportion of the study sample has complete data for prognostic factors.                                                                              | Yes           | Yes          | Yes         | Yes             | Yes          |
|                                     | 15.The method and setting of measurement are the same for all study participants.                                                                                 | Yes           | Yes          | Yes         | Yes             | Yes          |
| Outcome measurement                 | 16.Appropriate methods are used if imputation is used for missing prognostic factor data.                                                                         | Unsure        | Unsure       | Unsure      | Unsure          | Unsure       |
|                                     | 17.A clear definition of the outcome of interest is provided, including duration of follow-up and level and extent of the outcome construct                       | Yes           | Yes          | Yes         | Yes             | No           |
|                                     | 18.The outcome measure and method used are adequately valid and reliable to limit misclassification bias.                                                         | Yes           | Yes          | Yes         | Yes             | No           |
|                                     | 19.The method and setting of measurement are the same for all study participants.                                                                                 | Yes           | Yes          | Yes         | Yes             | Yes          |
| Confounding measurement and account | 20.All important confounders, including treatments are measured.                                                                                                  | Partly        | Partly       | Partly      | Partly          | Partly       |
|                                     | 21.Clear definitions of the important confounders measured are provided                                                                                           | Partly        | Partly       | Partly      | Partly          | Partly       |
|                                     | 22.Measurement of all important confounders is adequately valid and reliable                                                                                      | Unsure        | Unsure       | Unsure      | Unsure          | Unsure       |
|                                     | 23.The method and setting of confounding measurement are the same for all study participants.                                                                     | Yes           | Yes          | Yes         | Yes             | Yes          |
|                                     | 24.Appropriate methods are used if imputation is used for missing confounder data.                                                                                | Unsure        | Unsure       | Unsure      | Unsure          | Unsure       |
|                                     | 25.Important potential confounders are accounted for in the study design.                                                                                         | Yes           | Yes          | Yes         | Yes             | Yes          |
| Analysis                            | 26.Important potential confounders are accounted for in the analysis.                                                                                             | Yes           | Yes          | Yes         | Yes             | Yes          |
|                                     | 27.There is sufficient presentation of data to assess the adequacy of the analysis.                                                                               | Yes           | Yes          | Unsure      | Unsure          | Yes          |
|                                     | 28.The strategy for model building is appropriate and is based on a conceptual framework or model.                                                                | Yes           | Yes          | Yes         | Yes             | Yes          |
|                                     | 29.The selected model is adequate for the design of the study.                                                                                                    | Yes           | Yes          | Yes         | Yes             | Yes          |
|                                     | 30.There is no selective reporting of results.                                                                                                                    | No            | No           | No          | No              | No           |

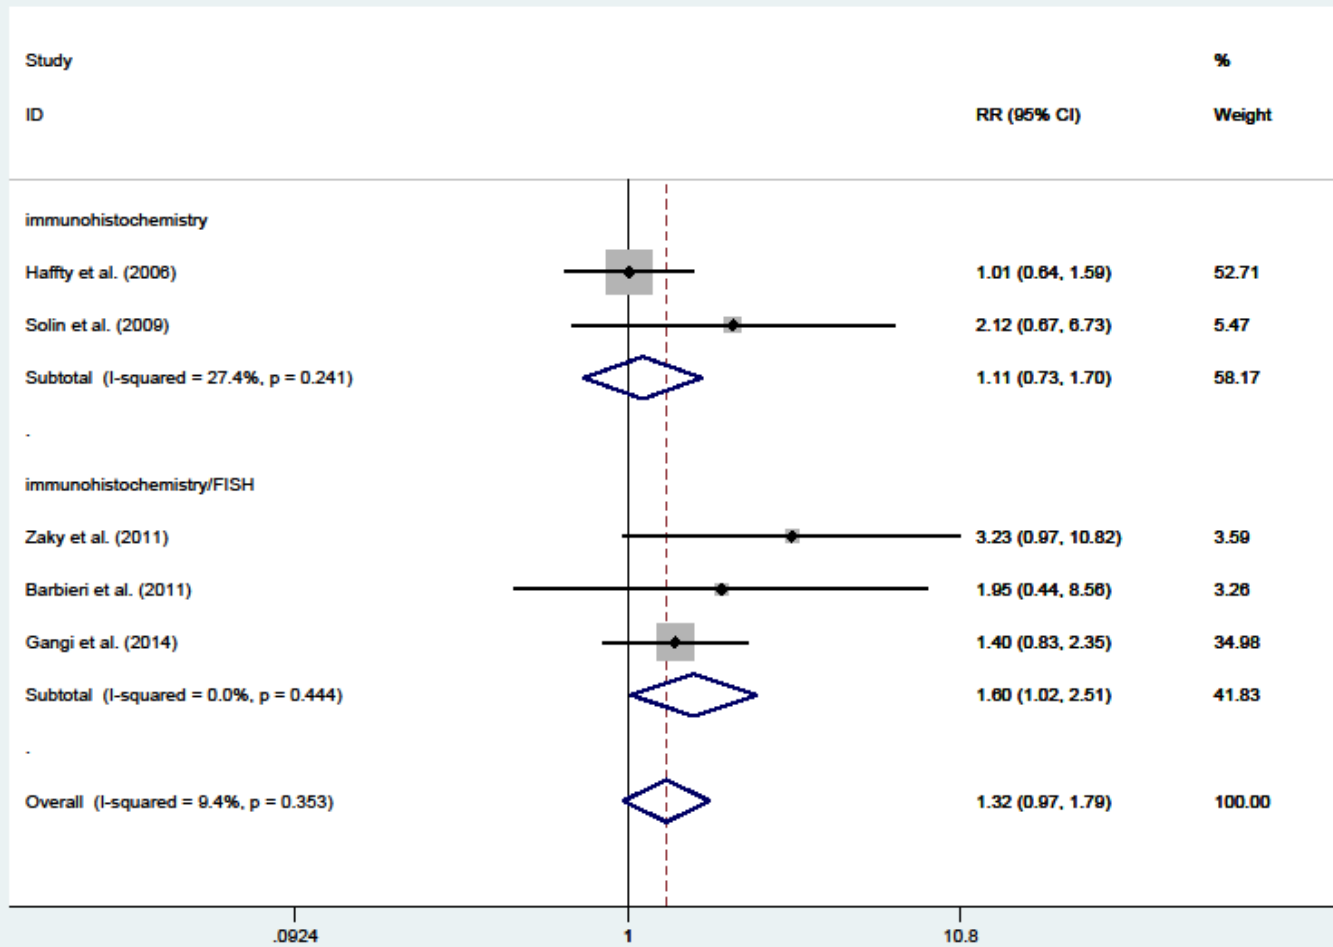

**Supplemental Fig. 1. A.** Pooled relative risks (RRs) of 5-year local relapse-free survival (LFS) of triple negative breast cancer (TNBC) versus non-TNBC

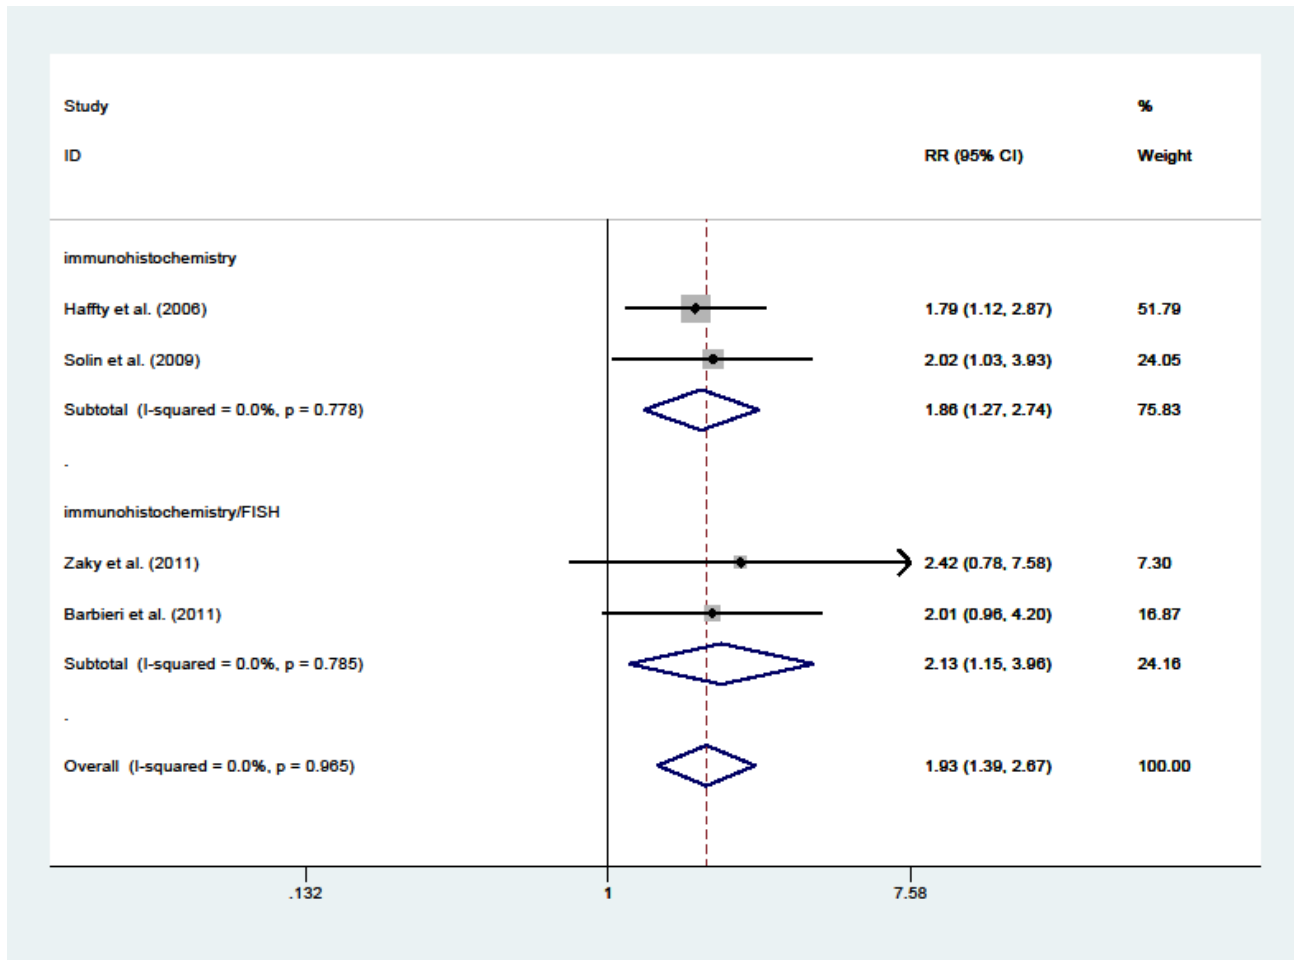

**Supplemental Fig. 1.B.** Pooled RRs of 5-year overall survival (OS) of TNBC versus non-TNBC

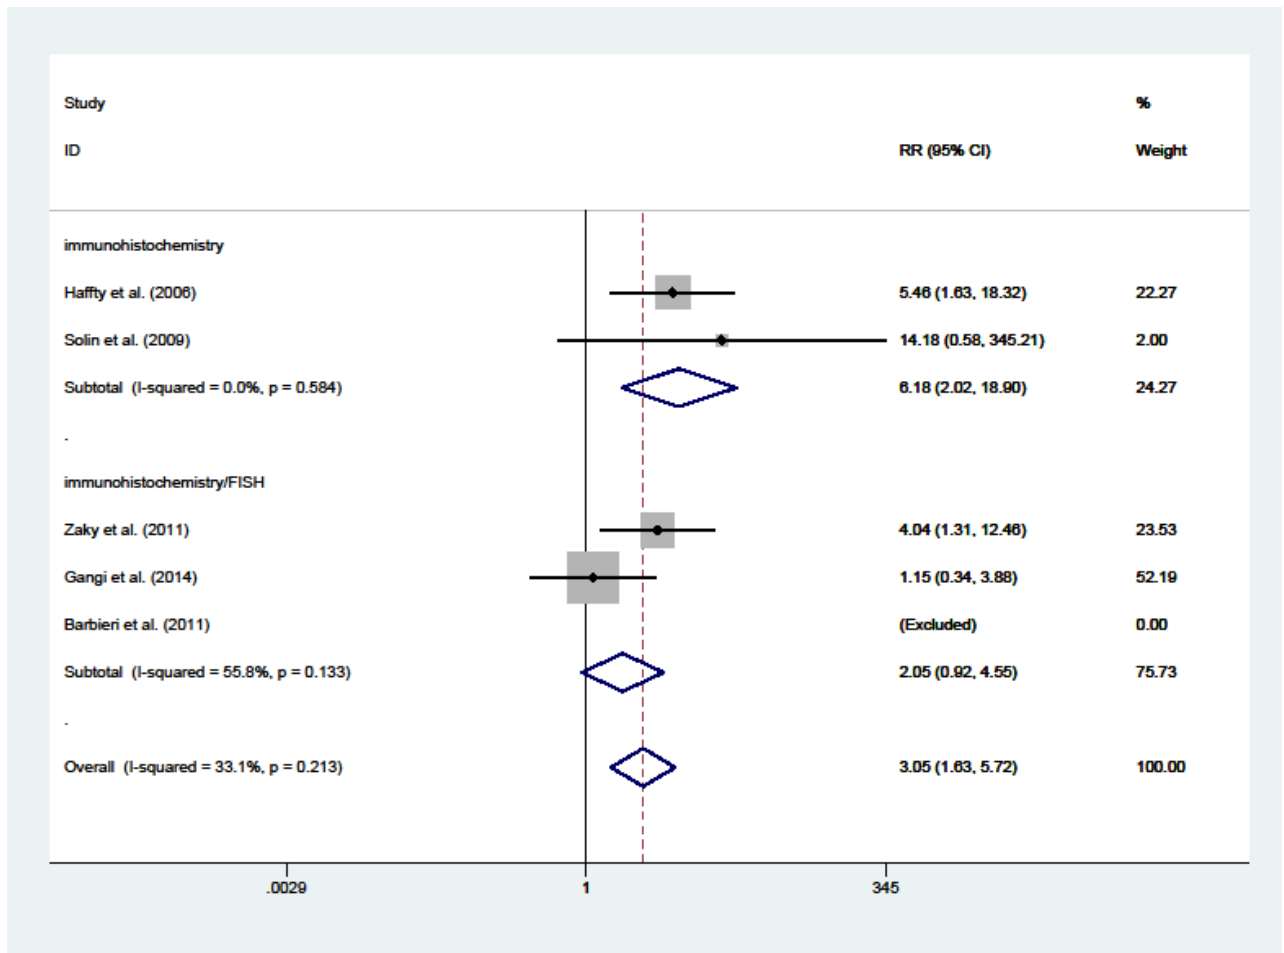

**Supplemental Fig. 1.C.** Pooled RRs of 5-year regional relapse-free survival (RFS) of TNBC versus non-TNBC



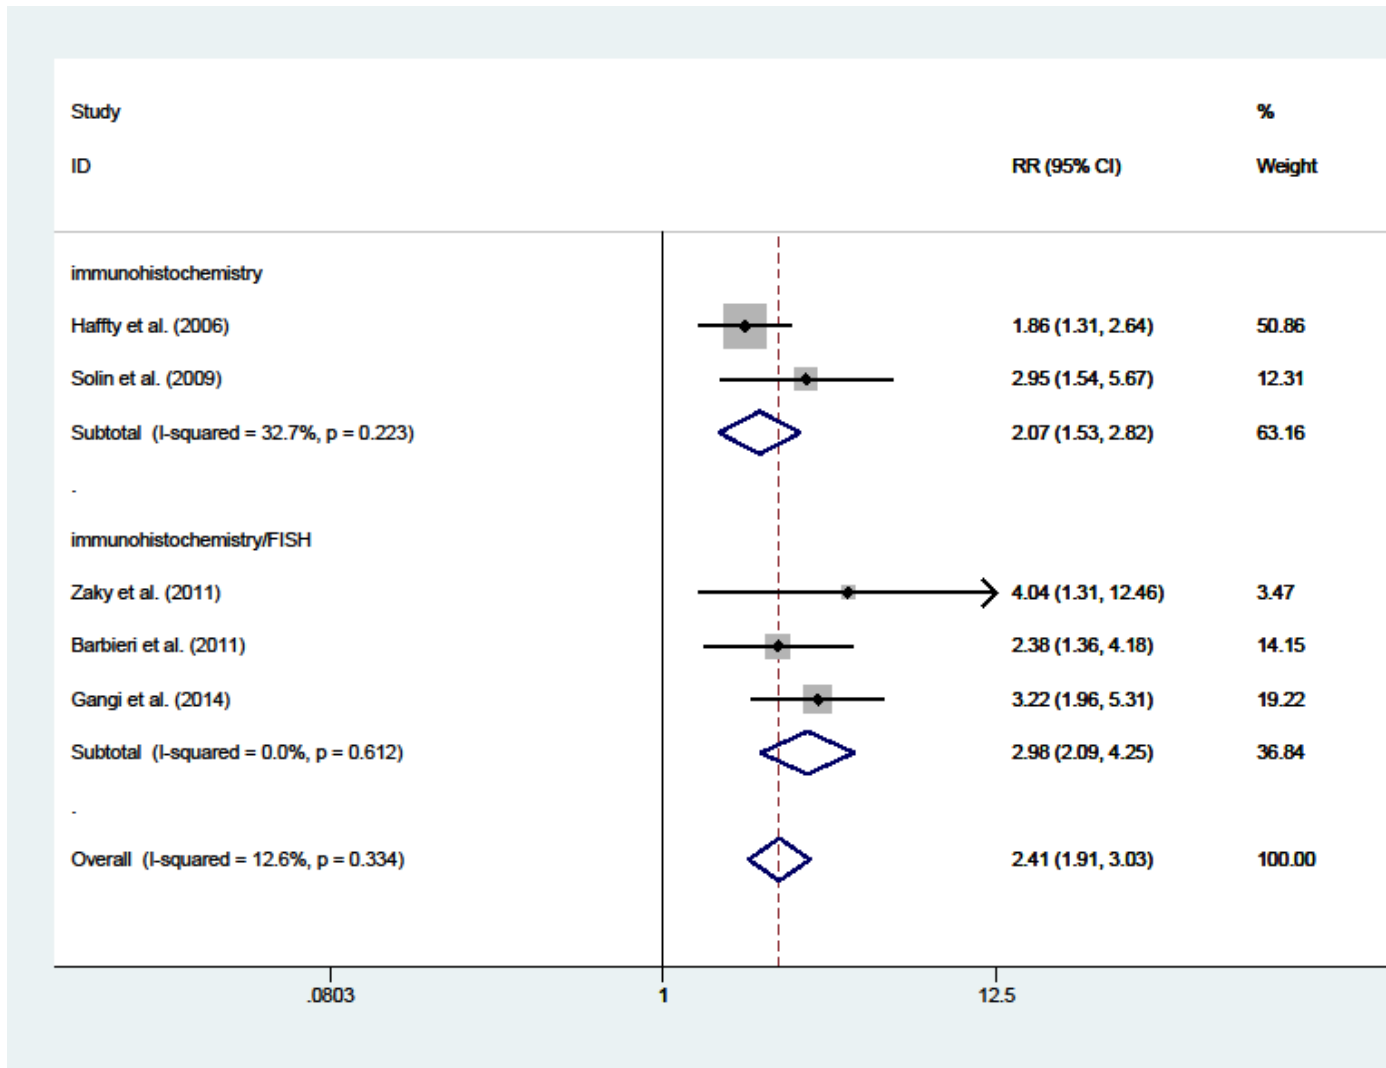

**Supplemental Fig. 1.D.** Pooled RRs of 5-year distant metastasis-free survival (DFS) of TNBC versus non-TNBC
